# Supplementary material for: SpliceV: analysis and publication quality printing of linear and circular RNA splicing, expression and regulation
Source: PubMed Central journal article supplement (PMC6507234; doi:10.1186/s12859-019-2865-7), 2019-05-08
Supplement: 12859_2019_2865_MOESM2_ESM.pdf [file 12859_2019_2865_MOESM2_ESM.pdf]

## Supplemental File 2

### Figure 1B

\* gencode.v29.basic.annotation.gtf file obtained from [ftp://ftp.ebi.ac.uk/pub/databases/gencode/Gencode\\_human/release\\_29/gencode.v29.basic.annotation.gtf.gz](ftp://ftp.ebi.ac.uk/pub/databases/gencode/Gencode_human/release_29/gencode.v29.basic.annotation.gtf.gz)

Download the file then run the following command:

```
gunzip gencode.v29.basic.annotation.gtf.gz
```

\* GRCh38.primary\_assembly.genome.fa file obtained from [ftp://ftp.ebi.ac.uk/pub/databases/gencode/Gencode\\_human/release\\_29/GRCh38.primary\\_assembly.genome.fa.gz](ftp://ftp.ebi.ac.uk/pub/databases/gencode/Gencode_human/release_29/GRCh38.primary_assembly.genome.fa.gz)

Download the file then run the following commands:

```
gunzip GRCh38.primary_assembly.genome.fa.gz
```

\* STAR (v2.5.2a) and bowtie2 (v2.3.3) genome indices need to be generated prior to running this pipeline. More information can be found here:

- <http://bowtie-bio.sourceforge.net/bowtie2/manual.shtml>
- <https://github.com/alexdobin/STAR/blob/master/doc/STARmanual.pdf>

\* Paired end FASTQ files can be obtained from the NCBI Sequence Read Archive (SRR7474078)

1. Generate **coverage** and **canonical splice junction** files:

```
STAR \  
--genomeDir GRCh38 \  
--runThreadN 14 \  
--readFilesIn SRR7474078_1.fastq SRR7474078_2.fastq \  
--outSAMtype BAM SortedByCoordinate \  
--outFileNamePrefix SRR7474078.
```

```
# Convert canonical splice junction file to SpliceV compatible format  
python SpliceV/bin/star_sj_convert SRR7474078.SJ.out.tab
```

2. Generate **back-splice junction** file with the find\_circ pipeline ([https://github.com/marvin-jens/find\\_circ](https://github.com/marvin-jens/find_circ)):

```
bowtie2 \  
-p 16 \  
--very-sensitive \  
--phred33 \  
--score-min=C,-15,0 \  
-x GRCh38 \  
--reorder \  
--mm \  
-q \  
-1 SRR7474078_1.fastq \  
-2 SRR7474078_2.fastq \  
2 > SRR7474078.firstpass.log | samtools view -hbuS - |samtools sort - \  
>SRR7474078.firstpass.bam
```

```
samtools view -hf 4 SRR7474078.firstpass.bam \  
| samtools view -Sb - > SRR7474078.unmapped.bam
```

```
find_circ/./unmapped2anchors.py SRR7474078.unmapped.bam >  
SRR7474078.anchors.fastq
```

```
bowtie2 \  
-p 16 \  
--reorder \  
--mm \  
--score-min=C,-15,0 \  
-q \  
-x GRCh38 \  
-U SRR7474078.anchors.fastq \  
2> SRR7474078.secondpass.log \  
| find_circ/./find_circ.py \  
--genome=GRCh38.primary_assembly.genome.fa \  
-s SRR7474078.stats.log > SRR7474078.bed 2> SRR7474078.reads
```

```
# Convert back-splice junction file to SpliceV compatible format  
SpliceV/bin/find_circ_convert SRR7474078.bed
```

3. Plot FARSA transcript using SpliceV:

```
SpliceV/bin/SpliceV \  
--bam SRR7474078.Aligned.sortedByCoord.out.bam \  
-sj SRR7474078.SJ.out.tab.canonical.bed \  
-bsj SRR7474078.bed.circles.bed \  
-gtf gencode.v29.basic.annotation.gtf \  
--gene FARSA \  
--filter 3 \  
-stranded reverse \  
-rnabp RBM3 HNRNPL HNRNPA1 PTBP1 \  
-rnabpc red purple blue green \  
-fa GRCh38.primary_assembly.genome.fa \  
-c 255,140,0
```

## Figure 1C

Paired end FASTQ files can be obtained from the NCBI Sequence Read Archive (SRR7474063; RNase R treated, SRR1032145; Poly-A selected)

1. Generate **coverage** and **canonical splice junction** files:

```
STAR \  
--genomeDir GRCh38 \  
--runThreadN 14 \  
--readFilesIn SRR1032145_1.fastq SRR1032145_2.fastq \  
--outSAMtype BAM SortedByCoordinate \  
--outFileNamePrefix SRR1032145.
```

```
# Convert canonical splice junction file to SpliceV compatible format  
python SpliceV/bin/star_sj_convert SRR1032145.SJ.out.tab
```

2. Generate **back-splice junction** file with the find\_circ pipeline ([https://github.com/marvin-jens/find\\_circ](https://github.com/marvin-jens/find_circ)):

```
bowtie2 \  
-p 16 \  
--very-sensitive \  
--phred33 \  
--score-min=C,-15,0 \  
-x GRCh38 \  
--reorder \  
--mm \  
-q \  
-1 SRR7474063_1.fastq \  
-2 SRR7474063_2.fastq \  
2 > SRR7474063.firstpass.log | samtools view -hbuS - |samtools sort - \  
>SRR7474063.firstpass.bam
```

```
samtools view -hf 4 SRR7474063.firstpass.bam \  
| samtools view -Sb - > SRR7474063.unmapped.bam
```

```
find_circ/./unmapped2anchors.py SRR7474063.unmapped.bam >  
SRR7474063.anchors.fastq
```

```
bowtie2 \  
-p 16 \  
--reorder \  
--mm \  
--score-min=C,-15,0 \  
-q \  
-x GRCh38 \  
-U SRR7474063.anchors.fastq \  
2> SRR7474063.secondpass.log \  
| find_circ/./find_circ.py \  
--genome=GRCh38.primary_assembly.genome.fa \  
-s SRR7474063.stats.log > SRR7474063.bed 2> SRR7474063.reads
```

```
# Convert back-splice junction file to SpliceV compatible format  
SpliceV/bin/find_circ_convert SRR7474063.bed
```

3. Plot GSE transcript using SpliceV:

```
python SpliceV/bin/SpliceV.py \  
--bam SRR1032145.Aligned.sortedByCoord.out.bam \  
-sj SRR1032145.SJ.out.tab.canonical.bed \  
-bsj SRR7474063.bed.circles.bed \  
-gtf gencode.v29.basic.annotation.gtf \  
--gene GSE1 \  
--filter 3 \  
-stranded reverse \  
-rnabp RBFOX1 MATR3 \  
-rnabpc yellow red \  
-fa GRCh38.primary_assembly.genome.fa \  
-alu alu_elements.bed \  
-c blue
```

\* alu\_elements.bed file obtained from <http://genome.ucsc.edu/cgi-bin/hgTables> with the following parameters:

```
group: Repeats  
track: RepeatMasker  
output format: BED – browser extensible data  
output file: rpt.bed
```

Download the file then run the following command:

```
grep Alu rpt.bed | cut -f1,2,3,6 > alu_elements.bed
```
